# Supplementary material for: Effects of Sex and Age on Fat Fraction, Diffusion-Weighted Image Signal Intensity and Apparent Diffusion Coefficient in the Bone Marrow of Asymptomatic Individuals: A Cross-Sectional Whole-Body MRI Study
Source: MDPI journal article supplement (doi:10.3390/diagnostics11050913), 2021-05-20
Supplement: s1 [file s1]

# Effects of Sex and Age on Fat Fraction, Diffusion-Weighted Image Signal Intensity and Apparent Diffusion Coefficient in the Bone Marrow of Asymptomatic Individuals: A Cross-Sectional Whole-Body MRI Study

**Supplementary Table S1.** Sequence components for the WB-MRI acquisition protocol used in this study compared to MY-RADS and MET-RADS protocols.

| Sequence description                                                                                              | MY-RADS<br>[1]                | MET-RADS<br>[2]                    | Our study                           |
|-------------------------------------------------------------------------------------------------------------------|-------------------------------|------------------------------------|-------------------------------------|
| Whole spine – sagittal, T1W TSE, 4–5 mm SLT                                                                       | Yes                           | Yes                                | No                                  |
| Whole spine – sagittal T2W TSE STIR (preferred) or fat suppressed, 4–5 mm SLT                                     | Yes                           | Yes                                | Yes                                 |
| Whole-body – axial, T1W GRE Dixon, 5 mm SLT                                                                       | Yes                           | Yes                                | Yes                                 |
| Fat image reconstructions mandatory                                                                               | (vertex to knees)             | (vertex to mid-thighs)             | (orbits to mid-thighs)              |
| Whole-body – axial, diffusion-weighted STIR, 5–7 mm SLT                                                           |                               |                                    |                                     |
| - b50-100 s/mm <sup>2</sup> and b800-1000 s/mm <sup>2</sup>                                                       | Yes                           | Yes                                | Yes                                 |
| - ADC calculations with mono-exponential data fitting                                                             | (vertex to knees)             | (skull base to mid-thighs)         | (orbits to mid-thighs)              |
| - Coronal b800–1000 multiplanar reconstruction                                                                    |                               |                                    |                                     |
| - 3D-MIP reconstructions of highest b-value images                                                                |                               |                                    |                                     |
| Whole-body – axial, T2W TSE without fat-suppression, 5 mm SLT - preferably matching the diffusion-weighted images | Optional<br>(vertex to knees) | Optional<br>(vertex to mid-thighs) | Yes<br>(orbits to mid-thighs)       |
| Regional assessments                                                                                              | Optional                      | Optional                           | Brain - T2W FLAIR<br>Lung - T1W GRE |

Notes: ADC=apparent diffusion coefficient, FLAIR=Fluid Attenuated Inversion Recovery, GRE=Gradient Echo, MIP=maximum intensity projection, SLT=slice thickness, STIR=Short Tau Inversion Recovery, TSE=Turbo Spin Echo

## References:

- Messiou, C.; Hillengass, J.; Delorme, S.; Lecouvet, F.E.; Mouloupoulos, L.; Collins, D.J.; Blackledge, M.D.; Abildgaard, N.; Østergaard, B.; Schlemmer, H.-P.; et al. Guidelines for Acquisition, Interpretation, and Reporting of Whole-Body MRI in Myeloma: Myeloma Response Assessment and Diagnosis System (MY-RADS). *Radiology* **2019**, *291*, 5–13, doi:10.1148/radiol.2019181949.
- Padhani, A.R.; Lecouvet, F.E.; Tunariu, N.; Koh, D.-M.; De Keyser, F.; Collins, D.J.; Sala, E.; Schlemmer, H.P.; Petralia, G.; Vargas, H.A.; et al. METastasis Reporting and Data System for Prostate Cancer: Practical Guidelines for Acquisition, Interpretation, and Reporting of Whole-body Magnetic Resonance Imaging-based Evaluations of Multiorgan Involvement in Advanced Prostate Cancer. *Eur. Urol.* **2017**, *71*, 81–92, doi:10.1016/j.eururo.2016.05.033.
